# Supplementary material for: Frequency of microsatellite instability (MSI) in upper tract urothelial carcinoma: comparison of the Bethesda panel and the Idylla MSI assay in a consecutively collected, multi-institutional cohort
Source: PubMed Central journal article supplement — J Clin Pathol. 2021 Sep 28;76(2):126–32. doi: 10.1136/jclinpath-2021-207855 (PMC9887356; doi:10.1136/jclinpath-2021-207855), 2021-09-28
Supplement: jclinpath-2021-207855supp001.pdf [file jclinpath-2021-207855supp001.pdf]

**Supplemental Table 1.** Antibodies used for immunohistochemistry

| <b>Antibody</b> | <b>Company</b> | <b>Clone</b> | <b>Dilution</b> |
|-----------------|----------------|--------------|-----------------|
| MLH1            | Dako           | ES05         | 1:50            |
| MSH2            | Ventana        | G219-1129    | ready to use    |
| MSH6            | BD Biosciences | 44/MSH6      | 1:300           |
| PMS2            | Dako           | EP51         | 1:40            |
